# Supplementary material for: A six-gene panel to label follicular adenoma, low- and high-risk follicular thyroid carcinoma
Source: PubMed Central journal article supplement — Endocr Connect. 2017 Nov 27;7(1):124–32. doi: 10.1530/EC-17-0261 (PMC5754511; doi:10.1530/ec-17-0261), 2017-11-27
Supplement: ec-7-124-t001.pdf [file ec-7-124-t001.pdf]

| MI-FTCs vs FAs    |        |         |        | WI-FTCs vs FAs  |        |         |         | WI-FTCs vs MI-FTCs |        |         |        |
|-------------------|--------|---------|--------|-----------------|--------|---------|---------|--------------------|--------|---------|--------|
| Gene              | log FC | P value | FDR    | Gene            | log FC | P value | FDR     | Gene               | log FC | P value | FDR    |
| <i>TIMP1</i>      | 1,62   | 0,0006  | 0,0434 | <i>ECM1</i>     | 5,81   | <0,0001 | <0,0001 | <i>ECM1</i>        | 4,81   | <0,0001 | 0,0006 |
| <i>MELK</i>       | 1,41   | 0,0025  | 0,0938 | <i>TFF3</i>     | -2,71  | 0,0002  | 0,0046  | <i>RXRG</i>        | 5,31   | 0,0001  | 0,0033 |
| <i>CKB</i>        | -1,11  | 0,0111  | 0,2027 | <i>SLC26A4</i>  | -2,19  | 0,0002  | 0,0046  | <i>SLC26A4</i>     | -2,01  | 0,0007  | 0,0176 |
| <i>SERPINA1</i>   | 1,38   | 0,0165  | 0,2027 | <i>CCNB2</i>    | 2,89   | 0,0004  | 0,0065  | <i>SDPR</i>        | -1,56  | 0,0012  | 0,0233 |
| <i>DPP4</i>       | 1,95   | 0,0216  | 0,2027 | <i>AGTR1</i>    | -3,77  | 0,0005  | 0,0065  | <i>TFF3</i>        | -2,22  | 0,0022  | 0,0326 |
| <i>RRM2</i>       | 1,47   | 0,0267  | 0,2110 | <i>RXRG</i>     | 4,63   | 0,0005  | 0,0065  | <i>CHI3L1</i>      | -2,23  | 0,0048  | 0,0601 |
| <i>TFCP2L1</i>    | -0,86  | 0,0209  | 0,2027 | <i>SDPR</i>     | -1,60  | 0,0007  | 0,0074  | <i>BUB1B</i>       | 2,33   | 0,0068  | 0,0732 |
| <i>CCNB2</i>      | 0,91   | 0,0190  | 0,2027 | <i>BUB1B</i>    | 2,85   | 0,0010  | 0,0077  | <i>PBK</i>         | 1,47   | 0,0124  | 0,1102 |
| <i>TPX2</i>       | 0,96   | 0,0281  | 0,2110 | <i>MPPED2</i>   | -2,25  | 0,0010  | 0,0077  | <i>CCNB2</i>       | 1,98   | 0,0147  | 0,1102 |
| <i>DIO2</i>       | -0,90  | 0,0191  | 0,2027 | <i>TFCP2L1</i>  | -1,82  | 0,0010  | 0,0077  | <i>ASPM</i>        | 1,54   | 0,0135  | 0,1102 |
| <i>AGTR1</i>      | -1,46  | 0,0327  | 0,2209 | <i>FN1</i>      | 1,31   | 0,0011  | 0,0078  | <i>DNASE1L3</i>    | -2,12  | 0,0178  | 0,1190 |
| <i>CHI3L1</i>     | 1,40   | 0,0353  | 0,2209 | <i>KIT</i>      | -2,95  | 0,0018  | 0,0111  | <i>MPPED2</i>      | -1,61  | 0,0190  | 0,1190 |
| <i>LRP4</i>       | 1,68   | 0,0395  | 0,2279 | <i>LRP4</i>     | 2,91   | 0,0019  | 0,0111  | <i>EGR2</i>        | -2,32  | 0,0278  | 0,1422 |
| <i>DGKI</i>       | -1,23  | 0,0448  | 0,2400 | <i>RRM2</i>     | 2,56   | 0,0024  | 0,0124  | <i>HMGA2</i>       | 2,12   | 0,0260  | 0,1422 |
| <i>SERTM1</i>     | -1,44  | 0,0676  | 0,2883 | <i>DNASE1L3</i> | -2,60  | 0,0027  | 0,0124  | <i>KIT</i>         | -2,10  | 0,0284  | 0,1422 |
| <i>CSGALNACT1</i> | -0,72  | 0,0491  | 0,2454 | <i>DGKI</i>     | -2,81  | 0,0025  | 0,0124  | <i>AGTR1</i>       | -2,31  | 0,0356  | 0,1585 |
| <i>PRSS23</i>     | 0,81   | 0,0692  | 0,2883 | <i>HMGA2</i>    | 2,76   | 0,0038  | 0,0167  | <i>NEK2</i>        | 1,70   | 0,0359  | 0,1585 |
| <i>FN1</i>        | 0,55   | 0,0651  | 0,2883 | <i>ASPM</i>     | 1,80   | 0,0042  | 0,0176  | <i>SLC5A8</i>      | -2,27  | 0,0441  | 0,1837 |
| <i>CEP55</i>      | 0,87   | 0,0831  | 0,3236 | <i>LRRK2</i>    | 3,60   | 0,0051  | 0,0203  | <i>SLC5A5</i>      | -2,37  | 0,0852  | 0,2904 |
| <i>NUSAP1</i>     | 0,65   | 0,0863  | 0,3236 | <i>NEK2</i>     | 2,24   | 0,0062  | 0,0220  | <i>FN1</i>         | 0,76   | 0,0549  | 0,2166 |
| <i>TOP2A</i>      | 0,88   | 0,1589  | 0,3968 | <i>TIMP1</i>    | 1,60   | 0,0055  | 0,0204  | <i>PRC1</i>        | 1,40   | 0,1038  | 0,2994 |
| <i>IGSF1</i>      | 1,79   | 0,1381  | 0,3699 | <i>MELK</i>     | 2,19   | 0,0087  | 0,0289  | <i>TFCP2L1</i>     | -0,96  | 0,0835  | 0,2904 |
| <i>KIT</i>        | -0,85  | 0,1179  | 0,3401 | <i>IPCEF1</i>   | -2,29  | 0,0089  | 0,0289  | <i>GABBR2</i>      | -1,67  | 0,1089  | 0,3024 |
| <i>ECM1</i>       | 1,00   | 0,0991  | 0,3401 | <i>DIO2</i>     | -1,34  | 0,0095  | 0,0296  | <i>DUOX2</i>       | 0,90   | 0,0675  | 0,2530 |
| <i>IPCEF1</i>     | -0,91  | 0,1108  | 0,3401 | <i>DPP4</i>     | 2,43   | 0,0156  | 0,0468  | <i>LRRK2</i>       | 2,13   | 0,0945  | 0,2952 |
| <i>QPCT</i>       | 1,07   | 0,1926  | 0,4128 | <i>NUSAP1</i>   | 1,83   | 0,0224  | 0,0620  | <i>DGKI</i>        | -1,58  | 0,0899  | 0,2930 |
| <i>NR4A3</i>      | -0,67  | 0,1672  | 0,3968 | <i>EGR2</i>     | -2,24  | 0,0284  | 0,0682  | <i>CITED1</i>      | 2,58   | 0,1337  | 0,3343 |
| <i>LGALS3</i>     | 0,95   | 0,1832  | 0,4040 | <i>QPCT</i>     | 2,17   | 0,0278  | 0,0682  | <i>NUSAP1</i>      | 1,18   | 0,1431  | 0,3458 |
| <i>MPPED2</i>     | -0,64  | 0,1319  | 0,3664 | <i>CKB</i>      | -1,33  | 0,0196  | 0,0567  | <i>IPCEF1</i>      | -1,38  | 0,1232  | 0,3194 |

| MI-FTCs vs FAs  |        |         |        | WI-FTCs vs FAs    |        |         |        | WI-FTCs vs MI-FTCs |        |         |        |
|-----------------|--------|---------|--------|-------------------|--------|---------|--------|--------------------|--------|---------|--------|
| Gene            | log FC | P value | FDR    | Gene              | log FC | P value | FDR    | Gene               | log FC | P value | FDR    |
| <i>TPO</i>      | -0,95  | 0,1075  | 0,3401 | <i>NR4A3</i>      | -1,50  | 0,0313  | 0,0701 | <i>NR4A1</i>       | -1,00  | 0,1235  | 0,3194 |
| <i>LRRK2</i>    | 1,48   | 0,2146  | 0,4470 | <i>IGSF1</i>      | 3,02   | 0,0257  | 0,0665 | <i>NPC2</i>        | 0,65   | 0,1001  | 0,2994 |
| <i>HMGA2</i>    | 0,64   | 0,1169  | 0,3401 | <i>DUOX2</i>      | 1,09   | 0,0232  | 0,0620 | <i>SERPINA1</i>    | -1,07  | 0,1621  | 0,3579 |
| <i>NEK2</i>     | 0,54   | 0,1140  | 0,3401 | <i>PROS1</i>      | 1,02   | 0,0291  | 0,0682 | <i>RRM2</i>        | 1,10   | 0,2140  | 0,4115 |
| <i>PROS1</i>    | 0,52   | 0,1746  | 0,3968 | <i>SLC5A8</i>     | -2,36  | 0,0318  | 0,0701 | <i>LRP4</i>        | 1,23   | 0,1660  | 0,3579 |
| <i>TENM1</i>    | 1,18   | 0,2626  | 0,4952 | <i>SERTM1</i>     | -2,32  | 0,0430  | 0,0888 | <i>SLIT1</i>       | 1,48   | 0,2449  | 0,4377 |
| <i>PTCHD4</i>   | 0,92   | 0,2707  | 0,4952 | <i>PBK</i>        | 1,17   | 0,0438  | 0,0888 | <i>NR4A3</i>       | -0,84  | 0,2491  | 0,4377 |
| <i>GABBR2</i>   | 0,82   | 0,2390  | 0,4772 | <i>NPC2</i>       | 0,82   | 0,0331  | 0,0709 | <i>COL9A3</i>      | -2,97  | 0,2211  | 0,4145 |
| <i>UBE2C</i>    | 0,46   | 0,2418  | 0,4772 | <i>PRC1</i>       | 1,54   | 0,0645  | 0,1241 | <i>PPARG</i>       | -0,43  | 0,1670  | 0,3579 |
| <i>BUB1B</i>    | 0,52   | 0,1714  | 0,3968 | <i>SLIT1</i>      | 2,17   | 0,0738  | 0,1318 | <i>CENPF</i>       | 0,55   | 0,2509  | 0,4377 |
| <i>SCEL</i>     | 0,67   | 0,4014  | 0,6235 | <i>TOP2A</i>      | 1,37   | 0,0806  | 0,1405 | <i>QPCT</i>        | 1,11   | 0,2761  | 0,4707 |
| <i>CDCA5</i>    | 0,37   | 0,1632  | 0,3968 | <i>NR4A1</i>      | -1,15  | 0,0670  | 0,1256 | <i>LIPH</i>        | 0,73   | 0,2123  | 0,4115 |
| <i>GGCT</i>     | 0,37   | 0,3634  | 0,5799 | <i>TPX2</i>       | 0,92   | 0,0915  | 0,1525 | <i>PLP1</i>        | -0,69  | 0,1476  | 0,3458 |
| <i>DNASE1L3</i> | -0,49  | 0,4073  | 0,6235 | <i>TG</i>         | -0,73  | 0,0491  | 0,0969 | <i>MELK</i>        | 0,78   | 0,3633  | 0,5561 |
| <i>SLIT1</i>    | 0,69   | 0,3052  | 0,5202 | <i>CDCA5</i>      | 0,82   | 0,0698  | 0,1276 | <i>PTCHD4</i>      | -0,98  | 0,4008  | 0,5895 |
| <i>SLC5A5</i>   | 0,64   | 0,5116  | 0,6976 | <i>TENM1</i>      | 2,11   | 0,1035  | 0,1651 | <i>SERTM1</i>      | -0,88  | 0,4671  | 0,6487 |
| <i>CDH3</i>     | 0,53   | 0,3034  | 0,5202 | <i>COL9A3</i>     | -3,89  | 0,1015  | 0,1651 | <i>TG</i>          | -0,52  | 0,1724  | 0,3591 |
| <i>TFF3</i>     | -0,48  | 0,3034  | 0,5202 | <i>CITED1</i>     | 2,49   | 0,1263  | 0,1934 | <i>PROS1</i>       | 0,51   | 0,2870  | 0,4783 |
| <i>PBK</i>      | -0,30  | 0,2682  | 0,4952 | <i>CSGALNACT1</i> | -0,83  | 0,0844  | 0,1439 | <i>CWH43</i>       | -0,99  | 0,4299  | 0,6084 |
| <i>RXRG</i>     | -0,68  | 0,4950  | 0,6976 | <i>PRSS23</i>     | 0,82   | 0,1355  | 0,2033 | <i>TENM1</i>       | 0,93   | 0,4897  | 0,6558 |
| <i>CENPF</i>    | 0,08   | 0,8357  | 0,8954 | <i>SLC5A5</i>     | -1,73  | 0,1895  | 0,2585 | <i>KIF4A</i>       | -0,33  | 0,1925  | 0,3902 |
| <i>MET</i>      | 0,34   | 0,4192  | 0,6288 | <i>CENPF</i>      | 0,63   | 0,1709  | 0,2419 | <i>TOP2A</i>       | 0,49   | 0,5418  | 0,7006 |
| <i>CWH43</i>    | -0,43  | 0,6063  | 0,7840 | <i>LIPH</i>       | 0,85   | 0,1390  | 0,2044 | <i>IGSF1</i>       | 1,23   | 0,3474  | 0,5428 |
| <i>EGR2</i>     | 0,08   | 0,9011  | 0,9167 | <i>TPO</i>        | -1,24  | 0,1150  | 0,1796 | <i>CDCA5</i>       | 0,45   | 0,3202  | 0,5221 |
| <i>PLP1</i>     | 0,36   | 0,3236  | 0,5393 | <i>CWH43</i>      | -1,42  | 0,2404  | 0,3108 | <i>CDH3</i>        | 0,61   | 0,5373  | 0,7006 |
| <i>PRC1</i>     | 0,15   | 0,7761  | 0,8560 | <i>CDH3</i>       | 1,14   | 0,2378  | 0,3108 | <i>LGALS3</i>      | -0,02  | 0,9886  | 0,9886 |
| <i>COL9A3</i>   | -0,92  | 0,4889  | 0,6976 | <i>CHI3L1</i>     | -0,83  | 0,1757  | 0,2440 | <i>SCEL</i>        | 0,03   | 0,9745  | 0,9886 |
| <i>ASPM</i>     | 0,25   | 0,3454  | 0,5632 | <i>KIF4A</i>      | -0,37  | 0,1429  | 0,2062 | <i>DPP4</i>        | 0,49   | 0,6268  | 0,7967 |
| <i>DUOX1</i>    | -0,24  | 0,5088  | 0,6976 | <i>LGALS3</i>     | 0,94   | 0,3630  | 0,4463 | <i>CTGF</i>        | -0,48  | 0,3353  | 0,5351 |

| MI-FTCs vs FAs |        |         |        | WI-FTCs vs FAs  |        |         |        | WI-FTCs vs MI-FTCs |        |         |        |
|----------------|--------|---------|--------|-----------------|--------|---------|--------|--------------------|--------|---------|--------|
| Gene           | log FC | P value | FDR    | Gene            | log FC | P value | FDR    | Gene               | log FC | P value | FDR    |
| <i>CITED1</i>  | -0,10  | 0,9277  | 0,9277 | <i>CEP55</i>    | 0,93   | 0,2795  | 0,3494 | <i>TPX2</i>        | -0,04  | 0,9421  | 0,9886 |
| <i>NR4A1</i>   | -0,15  | 0,7311  | 0,8308 | <i>GABBR2</i>   | -0,85  | 0,4009  | 0,4850 | <i>GGCT</i>        | -0,04  | 0,9394  | 0,9886 |
| <i>DUOX2</i>   | 0,19   | 0,5968  | 0,7840 | <i>PPARG</i>    | -0,36  | 0,2248  | 0,3010 | <i>DIO2</i>        | -0,44  | 0,3956  | 0,5895 |
| <i>PPARG</i>   | 0,07   | 0,7622  | 0,8532 | <i>SCEL</i>     | 0,70   | 0,4974  | 0,5653 | <i>UBE2C</i>       | -0,06  | 0,9101  | 0,9886 |
| <i>NPC2</i>    | 0,17   | 0,5636  | 0,7549 | <i>UBE2C</i>    | 0,40   | 0,4130  | 0,4917 | <i>SDC4</i>        | 0,33   | 0,4156  | 0,5994 |
| <i>SDC4</i>    | 0,12   | 0,6838  | 0,8308 | <i>SDC4</i>     | 0,46   | 0,2492  | 0,3167 | <i>FOSB</i>        | -0,59  | 0,4816  | 0,6558 |
| <i>SLC26A4</i> | -0,17  | 0,6509  | 0,8274 | <i>GGCT</i>     | 0,33   | 0,5243  | 0,5869 | <i>CEP55</i>       | 0,06   | 0,9461  | 0,9886 |
| <i>TG</i>      | -0,21  | 0,4404  | 0,6476 | <i>PTCHD4</i>   | -0,06  | 0,9596  | 0,9596 | <i>PRSS23</i>      | 0,02   | 0,9772  | 0,9886 |
| <i>FOSB</i>    | 0,14   | 0,8115  | 0,8821 | <i>SERPINA1</i> | 0,31   | 0,6883  | 0,7481 | <i>CKB</i>         | -0,23  | 0,6960  | 0,8700 |
| <i>CTGF</i>    | 0,12   | 0,7309  | 0,8308 | <i>CTGF</i>     | -0,36  | 0,4584  | 0,5290 | <i>MET</i>         | -0,15  | 0,7900  | 0,9404 |
| <i>DIO1</i>    | -0,27  | 0,7223  | 0,8308 | <i>FOSB</i>     | -0,44  | 0,5822  | 0,6421 | <i>DUOX1</i>       | 0,14   | 0,7727  | 0,9347 |
| <i>SLC5A8</i>  | -0,09  | 0,8944  | 0,9167 | <i>MET</i>      | 0,19   | 0,7254  | 0,7663 | <i>TIMP1</i>       | -0,02  | 0,9730  | 0,9886 |
| <i>SDPR</i>    | -0,04  | 0,9044  | 0,9167 | <i>PLP1</i>     | -0,33  | 0,4571  | 0,5290 | <i>CSGALNACT1</i>  | -0,11  | 0,8296  | 0,9722 |
| <i>LAMB3</i>   | 0,15   | 0,7301  | 0,8308 | <i>DUOX1</i>    | -0,10  | 0,8315  | 0,8557 | <i>LAMB3</i>       | -0,02  | 0,9773  | 0,9886 |
| <i>LIPH</i>    | 0,13   | 0,6901  | 0,8308 | <i>LAMB3</i>    | 0,13   | 0,8329  | 0,8557 | <i>DIO1</i>        | 0,14   | 0,8927  | 0,9886 |
| <i>PDLIM4</i>  | -0,07  | 0,7081  | 0,8308 | <i>DIO1</i>     | -0,13  | 0,8972  | 0,9093 | <i>TPO</i>         | -0,29  | 0,7242  | 0,8904 |
| <i>KIF4A</i>   | -0,04  | 0,8478  | 0,8956 | <i>PDLIM4</i>   | -0,10  | 0,7230  | 0,7663 | <i>PDLIM4</i>      | -0,02  | 0,9323  | 0,9886 |
